# Supplementary material for: Pluripotent Transcription Factors Possess Distinct Roles in Normal versus Transformed Human Stem Cells
Source: PubMed Central journal article supplement (PMC2778551; doi:10.1371/journal.pone.0008065), 2009-11-30

Ji et al., Supplemental Figure 1

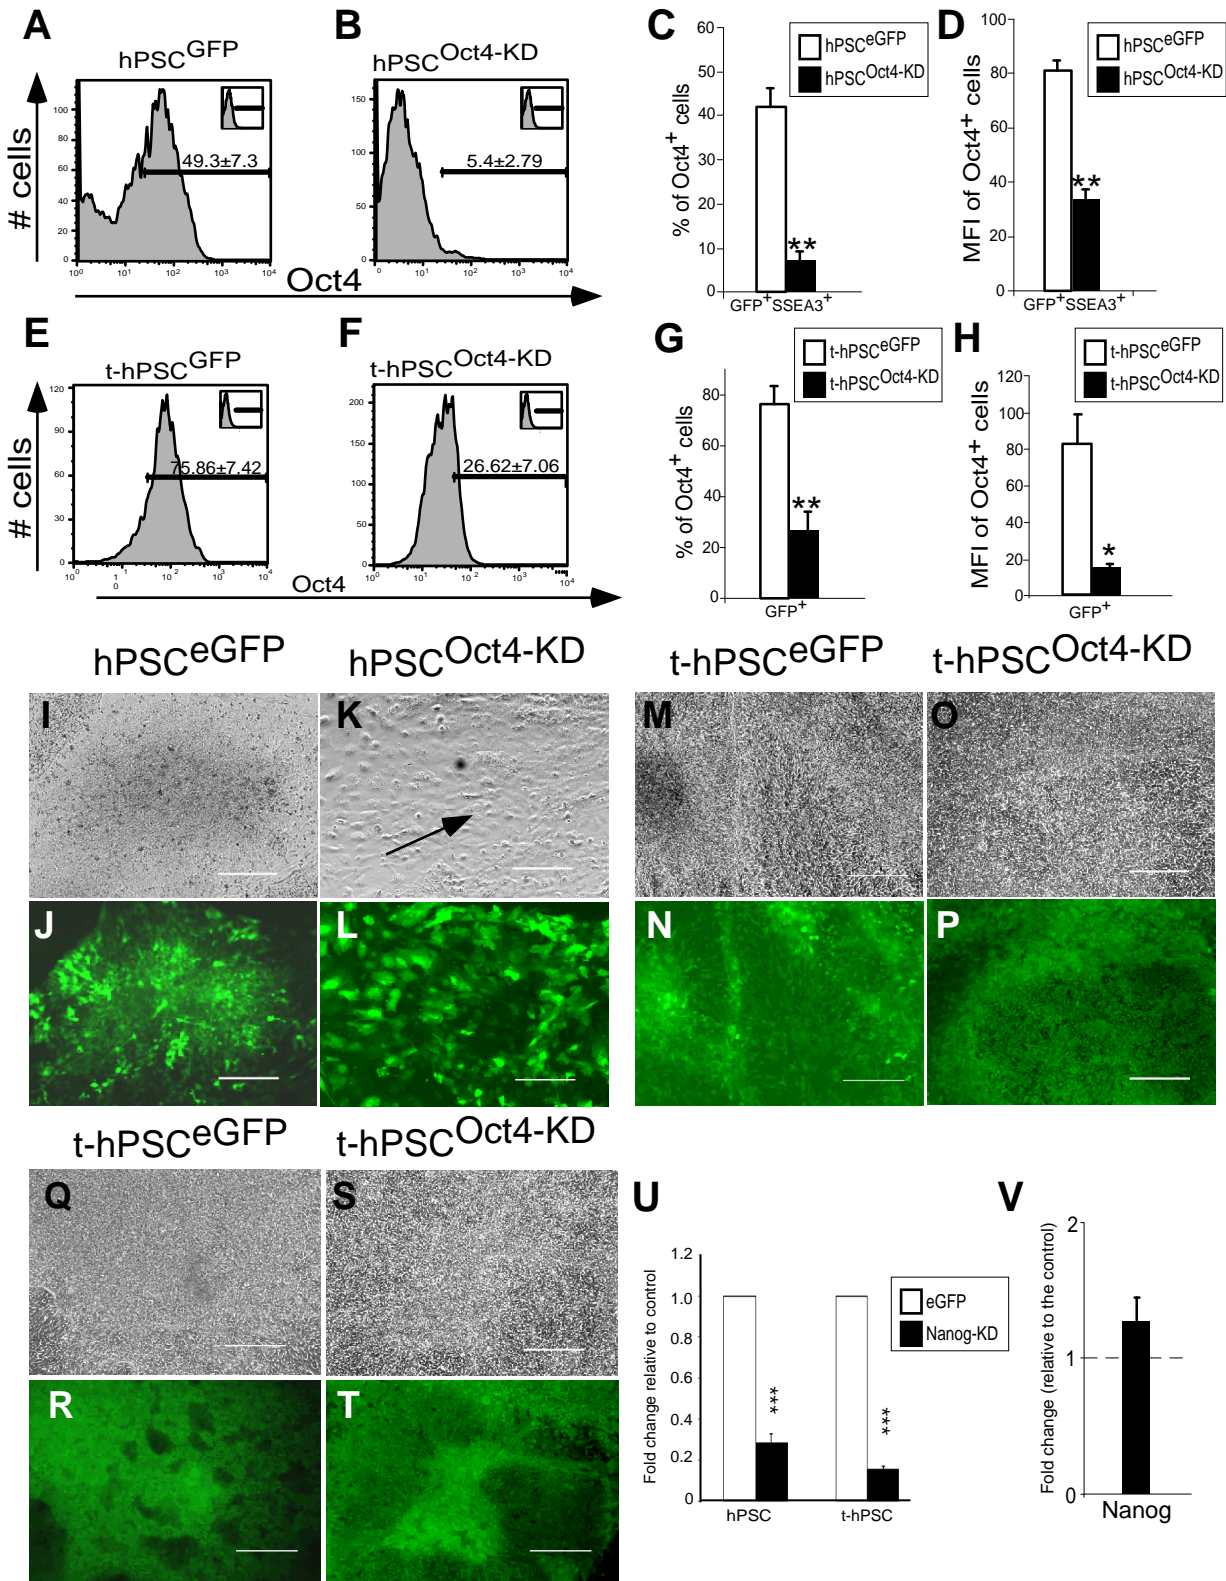

Supplement: pone.0008065.s001.pdf [file pone.0008065.s001.pdf]
