# Supplementary material for: Pluripotent Transcription Factors Possess Distinct Roles in Normal versus Transformed Human Stem Cells
Source: PLoS One. 2009 Nov 30;4(11):e8065. doi: 10.1371/journal.pone.0008065 (PMC2778551; doi:10.1371/journal.pone.0008065)
Supplement: Table S1 — Limiting dilution assay for teratoma formation from control and Oct4 knockdown t-hPSCs. (0.00 MB PDF) [file pone.0008065.s003.pdf]

Ji *et al.*, Supplemental Table 1

**Limiting dilution assay for t-hPSC<sup>Oct4-KD</sup> teratoma formation**

| Mouse ID | Cell info                 | Number of cells injected (x10 <sup>3</sup> ) | Volume of mass (cm <sup>3</sup> ) | Histology (HE) | Metastases | Lymphoma |
|----------|---------------------------|----------------------------------------------|-----------------------------------|----------------|------------|----------|
| 1#       | t-hPSC <sup>Oct4-KD</sup> | 66                                           | 0.13                              | 2 germ layers  | No         | No       |
| 2#       | t-hPSC <sup>Oct4-KD</sup> | 66                                           | 13.00                             | 3 germ layers  | No         | No       |
| 3#       | t-hPSC <sup>Oct4-KD</sup> | 66                                           | 3.00                              | 3 germ layers  | No         | No       |
| 4#       | t-hPSC <sup>Oct4-KD</sup> | 33                                           | 2.40                              | 3 germ layers  | No         | No       |
| 5#       | t-hPSC <sup>Oct4-KD</sup> | 33                                           | 3.74                              | 3 germ layers  | No         | No       |
| 6#       | t-hPSC <sup>Oct4-KD</sup> | 33                                           | 8.64                              | 3 germ layers  | No         | No       |
| 7#       | t-hPSC <sup>Oct4-KD</sup> | 15                                           | 1.60                              | 3 germ layers  | No         | No       |
| 8#       | t-hPSC <sup>Oct4-KD</sup> | 15                                           | 1.98                              | 3 germ layers  | No         | No       |
| 9#       | t-hPSC <sup>Oct4-KD</sup> | 15                                           | 9.60                              | 2 germ layers  | No         | No       |

Note: Control testes are normal and around 0.14g
