# Supplementary material for: Pluripotent Transcription Factors Possess Distinct Roles in Normal versus Transformed Human Stem Cells
Source: PLoS One. 2009 Nov 30;4(11):e8065. doi: 10.1371/journal.pone.0008065 (PMC2778551; doi:10.1371/journal.pone.0008065)
Supplement: Table S2 — Primers used in quantitative real-time reverse transcription-polymerase chain reaction studies. (0.25 MB PDF) [file pone.0008065.s004.pdf]

Ji *et al.*, Supplemental Table 2

**Primers used in quantitative real-time reverse transcription-polymerase chain reaction studies**

| Target gene        | NCBI accession number | Forward & Reverse primers                            |
|--------------------|-----------------------|------------------------------------------------------|
| <i>oct4/pou5f1</i> | NM_002701             | CTGAAGCAGAAGAGGATCAC<br>GACCACATCCTTCTCGAGCC         |
| <i>nanog</i>       | NM_024865             | CGAAGAATAGCAATGGTGTGACG<br>TTCCAAAGCAGCCTCCAAGTC     |
| <i>c-myc</i>       | NM_002467.3           | AGCGACTCTGAGGAGGAACAACAA<br>AGAAGGTGATCCAGACTCTGACCT |
| <i>sox2</i>        | NM_003106             | CGAGATAAACATGGCAATCAAATG<br>AACGTTTGCCTTAAACAAGACCAC |
| <i>dppa4</i>       | NM_018189             | ACCTCAGAAGAAGATACCAATCC<br>AAGGCACACAGGCGCTTA        |
| <i>tbx3</i>        | NM_005996.3           | TCCATGAGGGTGTGTTGATGA<br>CGCTGGGACATAAATCTTTGA       |
| <i>GAPDH</i>       | NM_014364             | TGCACCACCAACTGCTTAGC<br>GGCATGGACTGTGGTCATGAG        |
